# Supplementary material
Source: PubMed Central journal article supplement (PMC7617059)
Supplement: EMS101524-supplement-SuppInfo.pdf [file EMS101524-supplement-SuppInfo.pdf]

**Supplementary Table 1.** Summary of biological samples

| Mouse ID | Tissue                                | Batch num | n cells |
|----------|---------------------------------------|-----------|---------|
| m1       | Normal mammary fat pad                | 1         | 207     |
| m1       | Normal mammary fat pad                | 2         | 143     |
| m1       | Normal mammary fat pad                | 3         | 209     |
| m2       | Normal mammary fat pad                | 4         | 204     |
| m2       | Normal mammary fat pad                | 5         | 174     |
| m2       | Normal mammary fat pad                | 6         | 114     |
| m3       | Normal mammary fat pad                | 7         | 188     |
| m3       | Normal mammary fat pad                | 8         | 92      |
| m3       | Normal mammary fat pad                | 9         | 195     |
| m4       | Primary tumor, 2 weeks post injection | 10        | 243     |
| m4       | Primary tumor, 2 weeks post injection | 11        | 233     |
| m5       | Primary tumor, 2 weeks post injection | 12        | 255     |
| m5       | Primary tumor, 2 weeks post injection | 13        | 244     |
| m5       | Primary tumor, 2 weeks post injection | 14        | 243     |
| m6       | Primary tumor, 2 weeks post injection | 15        | 213     |
| m6       | Primary tumor, 2 weeks post injection | 16        | 167     |
| m7       | Primary tumor, 4 weeks post injection | 17        | 96      |
| m7       | Primary tumor, 4 weeks post injection | 18        | 60      |
| m7       | Primary tumor, 4 weeks post injection | 19        | 65      |
| m7       | Primary tumor, 4 weeks post injection | 20        | 38      |
| m7       | Primary tumor, 4 weeks post injection | 21        | 60      |
| m8       | Primary tumor, 4 weeks post injection | 22        | 218     |
| m8       | Primary tumor, 4 weeks post injection | 23        | 193     |
| m8       | Primary tumor, 4 weeks post injection | 24        | 231     |
| m8       | Primary tumor, 4 weeks post injection | 25        | 229     |
| m8       | Primary tumor, 4 weeks post injection | 26        | 236     |
| m8       | Primary tumor, 4 weeks post injection | 27        | 237     |
| m9       | Primary tumor, 4 weeks post injection | 28        | 144     |
| m9       | Primary tumor, 4 weeks post injection | 29        | 144     |
| m9       | Primary tumor, 4 weeks post injection | 30        | 116     |
| m9       | Primary tumor, 4 weeks post injection | 31        | 129     |
| m10      | Primary tumor, 4 weeks post injection | 32        | 165     |
| m10      | Primary tumor, 4 weeks post injection | 33        | 136     |
| m11      | Primary tumor, 4 weeks post injection | 34        | 81      |
| m11      | Primary tumor, 4 weeks post injection | 35        | 156     |
| m11      | Primary tumor, 4 weeks post injection | 36        | 39      |
| m11      | Primary tumor, 4 weeks post injection | 37        | 136     |
| m12      | Primary tumor, 4 weeks post injection | 38        | 92      |
| m12      | Primary tumor, 4 weeks post injection | 39        | 121     |
| m12      | Primary tumor, 4 weeks post injection | 40        | 219     |
| m12      | Primary tumor, 4 weeks post injection | 41        | 258     |
| m13      | Lung metastases                       | 42        | 128     |

|     |                 |    |     |
|-----|-----------------|----|-----|
| m13 | Lung metastases | 43 | 112 |
| m13 | Lung metastases | 44 | 118 |
| m14 | Lung metastases | 45 | 217 |
| m14 | Lung metastases | 46 | 198 |
| m14 | Lung metastases | 47 | 212 |
| m15 | Lung metastases | 48 | 200 |
| m15 | Lung metastases | 49 | 92  |
| m15 | Lung metastases | 50 | 33  |

**Supplementary Table 5.** Top 40 DE genes between EpCAM-GFP- sCAFs and EpCAM+GFP+ 4T1 cancer cells.

| * Gene    | **GFP- EpCAM- | **GFP- EpCAM+ | **GFP+ EpCAM- | **GFP+ EpCAM+ |
|-----------|---------------|---------------|---------------|---------------|
| Ccl3      | 12.4057137    | 7.53736747    | 0             | 0             |
| Hdc       | 11.4576988    | 5.92221425    | 2.49605844    | 0             |
| Ccl4      | 13.1592977    | 8.0952709     | 0.94731761    | 1.74952899    |
| Serpina1b | 10.4637127    | 2.77549865    | 1.51428295    | 0             |
| Il13      | 9.99739237    | 3.66610358    | 0             | 0             |
| Osm       | 9.88473918    | 3.37231169    | 0.94731761    | 0             |
| Ramp2     | 11.1172711    | 5.21925309    | 3.36216697    | 1.36456784    |
| Cyp11a1   | 9.74972947    | 4.11868813    | 0             | 0             |
| Des       | 10.5811615    | 3.66610358    | 1.92023697    | 0.83793993    |
| Ifitm1    | 10.4542694    | 3.66610358    | 2.2366874     | 0.83793993    |
| Csf2rb    | 10.4174865    | 4.53723893    | 2.2366874     | 0.83793993    |
| Cyp4b1    | 9.51858347    | 2.77549865    | 0.94731761    | 0             |
| Gpx3      | 11.5223889    | 11.0727436    | 1.92023697    | 2.05310563    |
| Serping1  | 11.5042001    | 4.67569914    | 3.36216697    | 2.05310563    |
| Csf2rb2   | 10.7807219    | 4.67569914    | 1.51428295    | 1.36456784    |
| Col3a1    | 11.0819377    | 4.67569914    | 2.49605844    | 1.74952899    |
| Cdh13     | 9.2649728     | 5.02567036    | 2.2366874     | 0             |
| Meg3      | 9.24685513    | 1.73935152    | 0             | 0             |
| Cxcl12    | 9.21738513    | 4.46268418    | 0             | 0             |
| Il4       | 9.16431816    | 3.79323816    | 0             | 0             |
| Etv4      | 6.41711128    | 8.55157789    | 9.2808219     | 9.43222119    |
| Krt14     | 7.75474804    | 10.9561468    | 7.87607232    | 10.7783469    |
| Rhox5     | 6.39095167    | 8.97014622    | 7.20622205    | 9.44694654    |
| C3        | 7.71312431    | 9.88553719    | 9.87716676    | 10.7757571    |
| Msln      | 6.41711128    | 8.88349371    | 9.30642962    | 9.48232149    |
| Mmp13     | 6.30950041    | 7.95952768    | 8.56179708    | 9.40231178    |
| Tslp      | 6.22317397    | 9.24776549    | 8.36462742    | 9.34056589    |
| Padi4     | 6.41711128    | 9.44461747    | 9.71453541    | 9.64157013    |
| Il24      | 5.96399668    | 8.49658613    | 8.3275886     | 9.19308659    |
| Lad1      | 6.7199833     | 9.3978649     | 9.15726209    | 9.95142293    |
| Sfn       | 6.5172496     | 10.8218544    | 7.23317612    | 9.74977814    |
| Cldn4     | 8.13171734    | 11.5909493    | 8.61400156    | 11.3842299    |
| Kcnn4     | 6.5648274     | 9.5085525     | 8.96698651    | 9.82810914    |
| Ankrd1    | 6.0993976     | 8.76051157    | 9.22596642    | 9.3905108     |
| Mmp9      | 8.52956968    | 11.4795616    | 10.8115591    | 11.8584689    |
| Spp1      | 10.23835      | 12.8797319    | 13.7380379    | 13.6181744    |
| Tns4      | 6.33716494    | 8.93265869    | 9.96152033    | 9.79011695    |
| Anxa8     | 6.03328503    | 9.38530556    | 8.7320854     | 9.49339766    |
| Syt8      | 6.06671999    | 8.89771264    | 9.67248442    | 9.55057096    |
| Gpa33     | 6.84086377    | 9.75884732    | 9.66425526    | 10.3350618    |

\* 20 most upregulated and 20 most downregulated genes from all genes with a minimum of  $2^8$  average normalized reads (between GFP+EpCAM+ and GFP-EpCAM-; 1525 in total). Genes upregulated in EpCAM-GFP- are in orange; Genes upregulated in EpCAM+GFP+ are in blue

\*\* Reads are presented as log2 normalized values.

**Supplementary Table 8.** TNBC cohort univariate analyses  
Two-way Cox proportional hazards model

| Variable (n)      |     | Hazard Ratio  | 95% CI          | P-Value |
|-------------------|-----|---------------|-----------------|---------|
| *CK (70)          |     | 36514.700     |                 | 0.028   |
| *Pdpn (70)        |     | 14019.614     |                 | 0.013   |
| S100A4 (70)       |     | 0.058         | 0 - 10075.709   | 0.644   |
| CD3 (68)          |     | 4.539         | 0.058 - 356.571 | 0.497   |
| S100A4/Pdpn (70)  |     | 0.388         | 0.199 - 0.758   | 0.005   |
| Pdpn/CK (70)      |     | 0.956         | 0.861 - 1.065   | 0.424   |
| S100A4/CK (70)    |     | 0.909         | 0.791 - 1.045   | 0.180   |
| LN (69)           |     | 1.865         | 0.865 - 3.964   | 0.105   |
| **Tumor size (69) | T1  | 1 [Reference] |                 |         |
|                   | T2  | 2.100         | 0.956 - 4.607   | 0.065   |
|                   | T3  | 4.475         | 1.258 - 15.921  | 0.021   |
| BRCA status (45)  | WT  | 1 [Reference] |                 |         |
|                   | Mut | 0.624         | 0.315 - 1.238   | 0.177   |
| Age (72)          |     | 1.022         | 0.999 - 1.045   | 0.062   |

\* CI with wide range, since variance of the markers is big

\*\* T1 = { TS ≤ 2} , T2 = {2 < TS ≤ 5}, T3 = {TS >5}, TS = Tumor Size (cm)

**Supplementary Table 10.** TNBC cohort Multiplicative Multivariate Analysis  
Two-way Cox proportional hazards model

| Variable (n)          | Hazard Ratio | 95% CI          | P-Value | Likelihood ratio test |
|-----------------------|--------------|-----------------|---------|-----------------------|
| S100A4/Pdpn (45)      | 0.828        | 0.421 - 1.631   | 0.585   | < 0.001               |
| BRCA status (45)      | 37.101       | 4.000 - 344.491 | 0.001   |                       |
| S100A4/Pdpn:BRCA (45) | 0.015        | 0.001 - 0.230   | 0.002   |                       |

| Variable (n)             | Hazard Ratio | 95% CI           | P-Value | Likelihood ratio test |
|--------------------------|--------------|------------------|---------|-----------------------|
| Pdpn/Total ROI (45)      | 5.57E+05     | 0.6 - 5.058E+11  | 0.059   | 0.095                 |
| BRCA status (45)         | 0.143        | 0.021 - 0.9692   | 0.046   |                       |
| Pdpn/Total ROI:BRCA (45) | 8.26E+12     | 2.778 - 2.45E+18 | 0.039   |                       |

**Supplementary Table 12.** Selected genes, priority, and fold change threshold for subset specific gene expression analysis

| <b>Group</b>         | <b>Gene</b> | <b>Priority</b> | <b>T_fold</b> |
|----------------------|-------------|-----------------|---------------|
| Wound healing        | Acta2       | 6               | 4.1           |
| Immune regulatory E  | Cxcl12      | 9               | 4.9           |
| ECM                  | Mfap5       | 5               | 8.2           |
| NMF                  | Gsn         | 5               | 18            |
| Inflammatory A       | Cxcl1       | 4               | 3.5           |
| Immune regulatory L  | Saa3        | 7               | 15            |
| Inflammatory B       | Il6         | 17              | 5             |
| Antigen presentation | Spp1        | 7               | 3.1           |
| Protein folding      | S100a4      | 13              | 1.77          |
